# **Short-term dehydration influences baseline, but not stress-induced corticosterone levels in the House sparrow (*Passer domesticus*)**

François Brischoux, Erika Beaugeard, Bertille Mohring, Charline Parenteau, Frédéric Angelier

Centre d'Etudes Biologiques de Chizé, CEBC UMR 7372 CNRS-Université de La Rochelle, 79360 Villiers en Bois

Correspondence:

F. Brischoux (francois.brischoux@gmail.com)

Summary statement: Elevated baseline corticosterone levels induced by water-restriction may have critical consequences on several major life-history traits such as energy budget, mobility and potential responses to predators.

## **Abstract.**

Future environmental variations linked to climate change are expected to influence precipitation regimes, and thus drinking water availability. Dehydration can be a particularly challenging physiological state for most organisms, yet no study has examined the effect of dehydration on the functioning of the Hypothalamus-Pituitary-Adrenal axis in wild endothermic animals, despite its central role in maintaining homeostasis. In this study, we experimentally imposed a temporary water shortage (~20 hours) to captive House sparrows in order to investigate the consequences of short-term dehydration on baseline and stress-induced corticosterone levels. As expected, water-deprived birds displayed higher plasma osmolality and haematocrit. Additionally, water-deprived birds had lower defecation rates, suggesting that the mechanisms allowing cecal water absorption may be triggered very rapidly during water-deprivation. Baseline, but not stress-induced corticosterone levels were higher in water-deprived birds. Taken together, these results suggest that water-restriction may have critical consequences on several corticosterone-related traits such as energy budget (protein catabolism and possibly feeding reduction), enhanced mobility (to promote water acquisition) and potential responses to predators (thirst threshold overriding the acute stress response). Owing to the possible fitness consequences of such components of the day-to-day life of birds, future studies should aim at investigating the influence of future changes in precipitation regimes and drinking water availability on bird populations.

**Key-words:** water, osmolality, haematocrit, stress, birds, defecation rate

## Introduction

Organisms respond to environmental variations with behavioural and/or physiological adjustments (Zera et al., 2007), and most of these responses are mediated by endocrine systems (Angelier and Wingfield, 2013; Taff and Vitousek, 2016). Regulations of such systems (e.g. the Hypothalamic–Pituitary–Adrenal [HPA] axis) usually result in important modifications in the circulating concentrations of mediators (e.g., corticosteroid) in the blood (Wingfield et al., 1998). In turn, such modifications in circulating hormone levels activate or inhibit specific physiological and/or behavioural mechanisms which allow an individual to cope with challenging situations (Zera and Harshmann, 2001; Wingfield and Sapolsky, 2003; McEwen and Wingfield, 2003; Romero et al., 2009). Seminal examples of such responses have been documented for a wide array of environmental disturbances such as resource availability, predation pressures, habitat modifications and anthropogenic disturbances (Wingfield, 2013; Wingfield et al., 2017).

Among these disturbances, current, or indeed future environmental variations linked to climate change have been of central interests for ecologists (Hoffmann and Sgro, 2011; McNamara et al., 2011). However, to our knowledge, most studies have only focused on the thermal consequences of climate change for wild animals (e.g. Saino et al., 2010; Burger et al., 2012). Climate change is also expected to influence precipitation regimes, and thus water availability with potential consequences on populations (Pearce-Higgin et al., 2015; Dupoué et al., 2017; Santini et al., 2018). Drinking water is among the most vital resources and water acquisition and

maintenance of water balance are critical components of the day-to-day life of most organisms (e.g. Perez et al., 2017). As a consequence, dehydration can be a particularly challenging physiological state for most organisms (reviewed in Rymer et al., 2016). Accordingly, dehydration is known to trigger behavioural and physiological adjustments that restore water balance and/or to reduce water loss (Gutierrez et al., 2011; 2015; Pena-Vilalabos et al., 2013; Sabat et al., 2017). So far, most studies have examined the consequences of a disruption of the water balance on metabolism (e.g. Gutierrez et al., 2015), oxidative status (e.g. Sabat et al., 2017), body condition (Gutierrez et al., 2011), and immunity (Gutierrez et al., 2013; Sabat et al., 2019). Interestingly, corticosterone has been suggested as a central mediator of these physiological traits (reviewed in Sapolsky et al., 2000; Romero, 2004; Landys et al., 2006). Increased circulating corticosterone levels are often related to increased metabolic rates (Jimeno et al., 2017), a depressed body condition (Lynn et al., 2010; Angelier et al., 2015), a reduced immunity (e.g. Martin et al., 2005; Gao and Deviche, 2019), and increased oxidative stress (reviewed in Costantini et al., 2011). Despite these robust links between corticosterone and these physiological mechanisms, no study has to our knowledge examined the effect of dehydration on corticosterone secretion in wild endothermic animals.

However, glucocorticoids (well-studied mediators of organismal allostasis, McEwen and Wingfield, 2003; Romero et al., 2009) and especially corticosterone should theoretically respond to dehydration for two main reasons. First, corticosteroids are important mediators of osmoregulation and they are involved in the control of salt

and water balance in most vertebrates (reviewed in McCormick and Bradshaw, 2006; see also Landys et al., 2006). Corticosterone, as a mineralocorticoid, has been shown to play a role in both ion and water transport after an osmotic challenge in vertebrates (McCormick and Bradshaw, 2006). Specifically, corticosterone has been shown to play a role in mechanisms regulating salt retention and Na reabsorption (McCormick and Bradshaw, 2006). Given the tight relationship between salt and water balance, corticosterone is likely to respond to dehydration and osmotic stress (Dupoué et al. 2014, 2016). In addition, it is also important for countercurrent concentrating mechanisms, in order to maintain plasma volume (Landys et al., 2006). Second, corticosterone secretion, as a 'stress hormone', is known to increase when organisms undergo some form of physiological stress, such as osmotic stress (Allen et al., 1975; Gutierrez, 2014).

Taken together, these elements strongly suggest that corticosterone levels should respond to short-term dehydration in order to promote behavioural and physiological adjustments that should restore water balance and/or to reduce water loss. In addition to increased circulating baseline corticosterone levels, dehydration may also functionally affect the release of this hormone in response to stress (Angelier and Wingfield, 2013). Specifically, dehydrated individuals may reach very high corticosterone levels because of the putative cumulative effect of dehydration and stress (McEwen and Wingfield, 2003; Romero et al., 2009; Wada and Heidinger, 2019).

In this study, we tested these hypotheses in the House sparrow (*Passer domesticus*). This species is particularly well-suited to investigate the physiological responses to short-term dehydration for several reasons (Goldstein and Zahedi, 1990; Gerson and Guglielmo, 2011). First, it inhabits a wide variety of habitats ranging from rural places to highly urbanised areas; and a wide variety of climates ranging from subarctic areas to desert regions; all of which display contrasting water availability. Second, even in places where water availability may be relatively high, House sparrows may face temporal water shortage depending on climatic conditions (e.g., during summer droughts or winter cold spells when free water availability is highly reduced). Finally, this species is easy to maintain in captivity in order to experimentally test the consequences of short-term water restriction. We experimentally imposed a temporary water shortage (~20 hours) to captive House sparrows in order to investigate the consequences of short-term dehydration on (1) baseline corticosterone levels and (2) stress-induced corticosterone levels (i.e. the corticosterone levels reached after a 30 min restraint stress, Wingfield et al., 1992). Concomitantly, we examined how this short-term dehydration affects body mass, osmolality, haematocrit and defecation rate, four variables that should be affected by dehydration. Specifically, we logically predicted that water shortage will be associated with (1) body mass loss because of dehydration (respiratory and transcutaneous water loss); (2) higher haematocrit and osmolality (proxies of hydration state); (3) lower defecation rate (number of faeces produced per unit of time) as longer retention time of faeces should improve cecal capacity for water absorption in order to decrease water loss; (4) higher baseline corticosterone levels because of the

stress of being dehydrated but also because of the involvement of corticosterone in osmoregulation; (5) higher stress-induced corticosterone levels if dehydration and restraint stress have cumulative effects on individual stress.

## Materials and Methods

### Captive housing

Study individuals were part of a captive colony maintained at the Centre d'Etudes Biologiques de Chizé (CEBC) in outdoor aviaries. On the 15<sup>th</sup> of November 2017 (10 days before the onset of the experiment), all experimental birds (N=21 adult females and N=10 adult males, all 2 years old) were moved in two indoor aviaries (housing respectively 15 and 16 birds) where they were individually placed in wire bird cages (Vision S01, 45.5x35.5x51 cm) allowing visual and acoustic contacts between individuals. Birds were supplied with mixed seeds *ad libitum*, salt/mineral blocks, water (changed daily), and millet on the stalk. Grit was supplied three times per week and cages were equipped with perches of varying heights. Birds were kept on a 10:14 light:dark cycle (light from 8:00 to 18:00), and the rooms were maintained at 20°C.

### Experimental procedures

The evening before measurements (shortly before the onset of the night phase ~18:00), we removed water bowls from the cages of water-deprived birds (controls retained access to water) in order to minimize disturbances the day after (birds

typically cease feeding and drinking at night), food remained in the cages and birds were weighed.

On measurement day at ~14:00 (i.e. 20h after water removal including the night period, ~6h effective water-shortage duration under day-light conditions), birds were captured and a small blood sample was collected within 3 min (mean=2.49±0.77 min, max=4 min). Birds were weighed and maintained in cloth bags for 30 min (mean=31.88±1.63 min, max=36.83 min) before a second blood sample was collected. Birds were then returned to their cages without food (seeds, salt/mineral blocks, and millet were all removed) but with *ad libitum* access to water during 30 min. After this post-handling rehydration phase, birds were then weighed again (total time = 1 hour since the previous body mass measurement) in order to quantify mass gain linked to drinking solely. Because we aimed at measuring the influence of short-term dehydration on both baseline and stress-induced corticosterone levels and because we could only confidently obtain baseline blood samples on a limited number of birds (baseline sampling has to occur within 3min after disturbance) we only treated 2 birds per room and per day. Each treatment (water-deprivation *versus* control) was evenly distributed between rooms. In order to avoid any influence of the captivity time on our experiment, half of the birds were first submitted to the water restricted condition and half of the birds were in the control condition. The birds experienced the other treatments during the second part of our experiment. As a consequence, all individuals experienced both treatments (water-deprivation and control). All experimental procedures were finished in mid-December when all birds were returned in their outdoor aviaries.

All experimental procedures were approved by French authorities (authorization # CE84-2019-9540 issued by the Comité d’Ethique Poitou-Charentes to FB and FA).

### Physiological measurements

Blood samples (100  $\mu$ l) were obtained via brachial venipuncture with 27-gauge needles and heparinized microcapillary tubes. Haematocrit (volume % of red blood cells) was measured on 10 $\mu$ l aliquots (Hirschmann minicaps microcapillary tubes) with a haematocrit centrifuge (Compur M 1101, Bayer). The remaining blood was centrifuged at 2000g for 7 min, plasma was separated and kept at -20°C for one month in sealed tubes until assays were conducted. All laboratory analyses were performed at the CEBC.

Plasma corticosterone was determined by radioimmunoassay, as described in Lormée et al. (2003). The minimum detectable [corticosterone] was 0.28 ng.ml<sup>-1</sup>, and the intra- and inter-assay coefficients of variation were 8.05% and 9.05% respectively (samples were assayed in duplicates, in 3 assays). Baseline and stress-induced samples of the same individuals within treatment were always run in the same assays, while treatments were randomly distributed between assays.

Plasma osmolality (mOsm.kg<sup>-1</sup>) was measured from 2 $\mu$ l aliquots on a Vapro2 osmometer (Elitech group).

Finally, because birds can retain faeces in their digestive tract in order to increase cecal capacity for water absorption and thus to decrease water loss, we counted faeces produced by the birds for the duration of the experiment (i.e., 20h) and we computed a defecation rate index (total number of faeces produced per hour). The

same procedure was repeated during the rehydration phase of the experiment (when birds had access to water *ad libitum*), for which we also computed a defecation rate index.

### Statistical analyses

Body mass changes were investigated using repeated-measures designs with the treatment (water-deprived *versus* control) as the factor and the three body mass measurements as the repeated variables. Osmolality, haematocrit, defecations rate, baseline and stress-induced corticosterone levels were investigated using generalized linear mixed models with the treatment (water-deprived *versus* control) as the factor. Relationships between corticosterone and other variables were investigated with generalized linear mixed models. Because all individuals experienced both treatments, individual identity was included as a random factor in all analyses. The sex of the bird never influenced our results and this parameter was not retained in our final analyses. Results are displayed as mean $\pm$ se. All analyses were performed with Statistica 12.

## Results

### Body mass changes

We found a significant effect of time ( $F_{2,60}=513.60$ ,  $p<0.0001$ , Figure 1) and of the interaction between time and treatment ( $F_{2,60}=75.12$ ,  $p<0.0001$ , Figure 1). Initial body mass was similar between treatment (Fisher's LSD,  $p=0.23$ , Figure 1). During the treatment, all birds lost mass, but water-deprived individuals lost more mass than control ones (Fisher's LSD,  $p<0.0001$ , Figure 1). During the post-handling restraint rehydration phase, water-deprived individuals gained mass (Fisher's LSD,  $p=0.001$ , Figure 1) while control individuals lost mass (Fisher's LSD,  $p<0.0001$ , Figure 1). Final body mass remained lower in water-deprived individuals (Fisher's LSD,  $p=0.001$ , Figure 1).

### Indices of dehydration

Osmolality was significantly higher in water-deprived individuals ( $F_{1,30}=4.62$ ,  $p=0.03$ , Figure 2). Across treatment, osmolality was negatively related to body mass loss during the experiment ( $F_{1,30}=4.42$ ,  $p=0.04$ ). Similarly, haematocrit was significantly higher in water-deprived individuals ( $F_{1,30}=21.38$ ,  $p<0.0001$ , Figure 2). Across treatment, haematocrit was negatively related to body mass loss during experiment ( $F_{1,30}=16.55$ ,  $p<0.0001$ ).

### Defecation rates

The number of faeces produced was significantly lower in water-deprived individuals ( $F_{1,30}=14.40$ ,  $p=0.0007$ , Figure 3). During the post-handling restraint

rehydration phase, the number of faeces produced was similar between treatments ( $F_{1,30}=0.02$ ,  $p=0.88$ ).

### Corticosterone levels

Baseline corticosterone was significantly higher in water-deprived individuals ( $F_{1,30}=13.077$ ,  $p=0.001$ , Figure 4). Across treatment, baseline corticosterone was negatively related to body mass loss during experiment ( $F_{1,30}=9.55$ ,  $p=0.004$ ), but not related to either haematocrit ( $p=0.2$ ) or osmolality ( $p=0.87$ ). Stress induced corticosterone was similar between water-deprived and control birds ( $F_{1,30}=0.13$ ,  $p=0.72$ , Figure 4).

## **Discussion**

In this study, we experimentally tested for the first time the influence of short-term dehydration on both baseline and stress-induced corticosterone levels in House sparrows. Indeed, corticosterone levels were expected to increase during short-term dehydration in order to promote behavioural and physiological adjustments that should restore water balance and/or to reduce water loss. In addition, as a proxy of stress levels, corticosterone levels were also expected to increase in water-restricted birds if dehydration is perceived as a stressor.

### *Dehydration in water-deprived sparrows*

Although the duration of water restriction was modest (i.e., 20h including the night period, ~6h effective water-shortage duration under day-light conditions as birds

typically cease feeding and drinking at night), all the proxies we used to assess dehydration responded as predicted. Water-deprived birds displayed higher plasma osmolality and haematocrit levels than control birds, suggesting a loss of body fluids (see also Goldstein and Zahedi, 1990; Gerson and Guglielmo, 2011). Both respiratory and trans-cutaneous water loss could be responsible for such a loss of body fluids. Similarly, water-deprived birds have lost more mass than controls, strengthening the fact that water-deprived birds have lost body fluids during our experimental treatment. Importantly, such loss of body mass may also be linked to a reduction of food intake during water-deprivation (MacMillen, 1962). We did not assess food consumption in our study, and thus we cannot tease apart the respective contribution of water-loss *versus* feeding reduction on the body mass loss we detected (Moldenhauer and Wiens, 1970). Yet, complementary results on defecation rates (see below), and especially those rates during the post-handling restraint rehydration phase suggest that feeding reduction may not have occurred during our experiment, or at least that feeding reduction and water loss occur concomitantly (Moldenhauer and Wiens, 1970). Nonetheless, future studies should usefully test for the influence of short-term water-deprivation on foraging behaviour in order to assess whether such a temporarily reduction of access to water may negatively affect the overall energy budget of small passerine birds. In the same vein, future studies are required in order to assess how stages of dehydration (i.e. minor *versus* severe) would influence the magnitude of such feeding reduction. Finally, our experimental design did not test for possible influences of water restriction on the activity levels of

birds, and future studies should investigate the behavioural consequences of water restriction in birds.

Longer retention time of faeces in the digestive tract is known to improve cecal capacity for water absorption in birds (Gasaway et al., 1976; Chaplin, 1989; Goldstein, 1989; Skadhauge, 2012). Accordingly, we found that water-deprived birds had lower defecation rates than controls, suggesting that the mechanisms allowing cecal water absorption may be triggered very rapidly (a few hours) during water-deprivation. Such lower defecation rate may also be linked to the putative feeding reduction discussed above (MacMillen, 1962; Moldenhauer and Wiens, 1970). We cannot entirely rule out this alternative hypothesis, or indeed tease apart the respective contribution of increased retention time of faeces *versus* feeding reduction. Yet, the fact that water-deprived birds had similar defecation rates than control birds during the post-handling restraint rehydration phase (during which access to food was precluded) strongly suggests that the lower defecation rates we detected during water-deprivation are linked to mechanisms that aim at reducing additional water-loss (Moldenhauer and Wiens, 1970), rather than a preceding reduction of feeding. Future studies should investigate not only faeces number but also their size, mass and water content (i.e., water-restricted birds could have produced less and drier faeces than control birds).

### *Influence of water-deprivation on baseline corticosterone levels*

According to our prediction, we found that baseline corticosterone levels were higher in water-deprived birds. Indeed, corticosterone is a pleiotropic mediator, and such result was expected for several reasons. First, corticosterone is presumed to act as a mineralocorticoid, and thus to play a role in the maintenance of osmotic balance (reviewed in McCormick and Bradshaw, 2006; see also Landys et al., 2006). Because our experimental treatment affected water balance (increased osmolality and haematocrit), the increase in baseline corticosterone level we found may reflect the role of this hormone in the control of osmotic balance (Allen et al., 1975; Bradshaw, 1975). Second, House sparrows and other bird species have been shown to increase protein catabolism in response to water restriction, as a metabolic strategy to compensate for water loss and to produce water to maintain osmotic balance (Goldstein and Zahedi, 1990; Gerson and Guglielmo, 2011). In this respect, increased corticosterone levels could reflect such metabolic strategy. In turn, the possible loss of condition in water-restricted individuals (body mass loss, possible protein catabolism) could also induce elevated baseline corticosterone levels. This interpretation is supported by the absence of correlation between osmolality and baseline corticosterone levels across treatment, while both variables were negatively correlated to body mass loss. Body mass loss, and more specifically protein catabolism, has been shown to be associated with increased baseline corticosterone levels in numerous bird species (Cherel et al., 1988; Lynn et al., 2003, 2010; Angelier et al., 2015). Actually, both mechanisms are plausible and may even interact with each other. Future studies are required to disentangle the role of corticosterone on

protein catabolism, or the role of loss of condition on corticosterone; or indeed the interactions between these mechanisms.

Finally, the dehydration produced by our treatment may have triggered a state of osmotic stress, a form of physiological stress that may activate the HPA axis which in turn would result in increased levels of circulating corticosterone (Wingfield et al., 1998, 2013; Sapolsky et al., 2000). Clearly, future studies are needed to disentangle these hypotheses. In this respect, concomitant measurements of other endocrine regulators of water balance and osmotic homoeostasis in non-mammalian vertebrates (i.e., AVT, aldosterone, prolactin) would be helpful (Arad and Skadhauge, 1984). Overall, all of these physiological responses to water-restriction would produce increased baseline corticosterone levels; and such increased baseline corticosterone levels may enhance mobility (Breuner et al., 1998; Lynn et al., 2003; Angelier et al., 2007; Krause et al., 2017) and thus allow dehydrated individuals to disperse to alternative localities in order to promote water acquisition. It is noteworthy that longer retention time of faeces to improve cecal capacity for water absorption may be mediated by increased corticosterone levels (Grubb and Bentley, 1992). Finally, higher baseline corticosterone concentrations may also result from the decreased plasma volume due to water-restriction. It is noteworthy to highlight that corticosterone has an important role for countercurrent concentrating mechanisms in order to maintain plasma volume (Landys et al., 2006). Clearly, future studies should aim at assessing the response of plasma volume to water-restriction as well as its consequence of circulating hormonal mediators.

### *Influence of water-deprivation on stress-induced corticosterone levels*

Interestingly, stress-induced corticosterone levels were similar between treatments, indicating that maximal stress-induced corticosterone levels may be independent of the dehydration state. Such contrasted dynamics of the corticosterone stress response may have important consequences on the speed at which behavioural and physiological components change in response to an additional stress (Angelier and Wingfield, 2013). These stress-related behavioural and physiological effects are mediated by the binding of corticosterone to low-affinity receptors, which occurs only when the high-affinity receptors are saturated with corticosterone (Romero, 2004; Landys et al., 2006) and such binding is likely to occur earlier in water-restricted birds because of their higher baseline corticosterone levels. In that respect, it would have been interesting to measure the kinetics of the corticosterone stress response by measuring corticosterone levels after 15 mins of restraint for example. In addition, it would have been interesting to measure the speed at which birds return to baseline corticosterone levels after release from handling restraint, in order to determine if the water restricted birds return to normal corticosterone levels faster.

Although stress-induced corticosterone levels were similar between treatments, behavioural and physiological responses to stress appear very different. During the post-handling restraint rehydration phase (when individuals had access to water), control birds showed a rapid mass loss, suggesting that the restraint protocol was associated with increased body mass loss in that group (through increased

metabolism and the use of body reserves) and reduced drinking behaviour.

Conversely, water-restricted individuals increased body mass during this rehydration phase, demonstrating that they drank significant amounts of water during the 30 minutes following the restraint protocol. This suggests not only that they drank water to restore their osmotic balance, but also that the necessity to drink and to restore their osmotic balance (and thus the thirst threshold) have override the behavioural/physiological impacts of restraint stress, which were found in control birds.

### *Conclusion*

Elevated baseline corticosterone levels induced by water-restriction may have critical consequences on several major life-history traits such as energy budget (protein catabolism and possibly feeding reduction), enhanced mobility (to promote water acquisition) and potential responses to predators (thirst threshold overriding the acute stress response). Owing to the possible fitness consequences of such components of the day-to-day life of birds, future studies should aim at investigating the influence of future changes in precipitation regimes and free water availability on bird populations.

## **Acknowledgements**

We thank the CNRS, the Région Nouvelle Aquitaine (MULTISTRESS & AQUASTRESS), the ANR (Urbastress, ANR-16-CE02-0004-01) and the CPER Econat for funding. Christian Thiburce and Elsa Daniaud helped with animal care during the experiment, and Colette Trouvé and Emannuelle Seghrouchni helped with hormonal assays.

## References

- Allen JC, Abel JH Jr., Takemoto DJ. 1975. Effect of osmotic stress on serum corticoid and plasma glucose levels in the duck (*Anas platyrhynchos*). *General and Comparative Endocrinology* 26: 209–216.
- Angelier F, Shaffer S.A, Weimerskirch H, Trouve C, Chastel O. Corticosterone and foraging behavior in a pelagic seabird. *Physiol. Biochem. Zool.* 2007;80:283–292;
- Angelier F, Wingfield JC (2013) Importance of the glucocorticoid stress response in a changing world: theory, hypotheses and perspectives. *Gen Comp Endocrinol* 190:118–128
- Angelier F, Wingfield JC, Parenteau C, Pellé M, Chastel O. Does short-term fasting lead to stressed-out parents? A study of incubation commitment and the hormonal stress responses and recoveries in snow petrels. *Horm Behav.* 2015;67: 28–37.
- Angelier, F. & Wingfield, J.C. (2013) Importance of the glucocorticoid stress response in a changing world: theory, hypotheses and perspectives. *General and Comparative Endocrinology*, 190, 118–128.
- Arad, Z. and Skadhauge, E. (1984), Plasma hormones (arginine vasotocin, prolactin, aldosterone, and corticosterone) in relation to hydration state, NaCl intake, and egg laying in fowls. *J. Exp. Zool.*, 232: 707-714.
- Astheimer LB, Buttemer WA, Wingfield JC. Interactions of corticosterone with feeding, activity and metabolism in passerine birds. *Ornis Scand* 1992;23:355–65

- Bradshaw, S. D. (1975). Osmoregulation and pituitary-adrenal function in desert reptiles. *Gen. Comp. Endocrinol.* 25, 230-248.
- Breuner CW, Greenberg AL, and Wingfield JC. Noninvasive corticosterone treatment rapidly increases activity in Gambel's white-crowned sparrows (*Zonotrichia leucophrys gambelii*). *Gen Comp Endocrinol* 111: 386-394, 1998.
- Burger C, Belskii E, Eeva T, Laaksonen T, Magi M, et al. (2012) Climate change, breeding date and nestling diet: how temperature differentially affects seasonal changes in pied flycatcher diet depending on habitat variation. *Journal of Animal Ecology* 81: 926-936.
- Chaplin, S. B. (1989), Effect of cecectomy on water and nutrient absorption of birds. *J. Exp. Zool.*, 252: 81-86.
- Cherel Y., J.P. Robin, O. Walch, H. Karmann, P. Netchitailo, and Y. Le Maho. 1988. Fasting in king penguin. I. Hormonal and metabolic changes during breeding. *American Journal of Physiology* 254:R170-R177.
- Costantini, D., Marasco, V. & Møller, A.P. (2011) A meta- analysis of glucocorticoids as modulators of oxidative stress in vertebrates. *Journal of Comparative Physiology B*, 181, 447- 456.
- Dupoué A, Angelier F, Lourdais O, Bonnet X, Brischoux F. (2014) Effect of water deprivation on baseline and stress-induced corticosterone levels in the Children's python (*Antaresia childreni*). *Comparative Biochemistry and Physiology Part A*, 168:11-16.

- Dupoué A, Angelier F, Brischoux F, DeNardo DF, Trouvé C, Parenteau C, Lourdaïs. (2016) Water deprivation increases maternal corticosterone levels and enhances offspring growth in the snake *Vipera aspis*. *Journal of Experimental Biology* 219:658-667.
- Dupoué A, Rutschmann A, Le Galliard JF et al (2017) Water availability and environmental temperature correlate with geographic variation in water balance in common lizards. *Oecologia* 185:561-571.
- Gao S, Deviche PJ. 2019. The causative effects of corticosterone on innate immunity during the stress response in the House Sparrow, *Passer domesticus*. *General and Comparative Endocrinology*, 275, 30-37
- Gasaway, W, White, R, Holleman, D. 1976. Digestion of Dry Matter and Absorption of Water in the Intestine and Cecum of Rock Ptarmigan. *The Condor*. 78. 77-84.
- Gerson, A. R. and Guglielmo, C. G. (2011). House sparrows (*Passer domesticus*) increase protein catabolism in response to water restriction. *Am. J. Physiol.* 300, R925-R930.
- Goldstein, D. L. and Zahedi, A. (1990). Variation in osmoregulatory parameters of captive and wild house sparrows. *Auk* 107, 533-538
- Goldstein, D. L. (1989), Absorption by the cecum of wild birds: Is there interspecific variation?. *J. Exp. Zool.*, 252: 103-110.
- Grubb BR, and Bentley PJ. Effects of corticosteroids on short-circuit current across the cecum of the domestic fowl, *Gallus domesticus*. *Comparative Biochemistry and Physiology A* 162: 690-695, 1992

- Gutiérrez JS, Soriano-Redondo A, Dekinga A, Villegas A, Masero JA, Piersma T.  
2015. How salinity and temperature combine to affect physiological state and performance in red knots with contrasting non-breeding environments. *Oecologia*. 178: 1077–1091.
- Gutierrez, J.S. (2014) Living in environments with contrasting salinities: a review of physiological and behavioural responses in waterbirds. *Ardeola*, 61, 233–256.
- Gutierrez, J.S., Abad-Gomez, J.M., Villegas, A., Sanchez-Guzman, J.M. & Masero, J.A.  
(2013) Effects of salinity on the immune response of an “osmotic generalist” bird. *Oecologia*, 171, 61–69
- Gutierrez, J.S., Masero, J.A., Abad-Gomez, J.M., Villegas, A. & Sanchez-Guzman, J.M.  
(2011) Understanding the energetic costs of living in saline environments: effects of salinity on basal metabolic rate, body mass, and daily energy consumption of a long-distance migratory shorebird. *Journal of Experimental Biology*, 214, 829–835
- Hoffman AA, Sgro CM. Climate change and evolutionary adaptation. *Nature*. 2011;470:479–485.;
- Jimeno B, Hau M, Verhulst S. 2017. Strong association between corticosterone levels and temperature-dependent metabolic rate in individual zebra finches. *Journal of Experimental Biology* 220: 4426–4431
- Krause JS, Pérez JH, Meddle SL, Wingfield JC. 2017. Effects of short-term fasting on stress physiology, body condition, and locomotor activity in wintering male white-crowned sparrows. *Physiology & Behavior*, 177:282–290,

- Landys, M.M., Ramenofsky, M., Wingfield, J.C., 2006. Actions of glucocorticoids at a seasonal baseline as compared to stress-related levels in the regulation of periodic life processes. *Gen. Comp. Endocrinol.* 148, 132–149.
- Lynn, S.E., Breuner, C.W., Wingfield, J.C., 2003. Short-term fasting affects locomotor activity, corticosterone and corticosterone binding globulin in a migratory songbird. *Hormones & Behavior* 43, 150–157.
- Lynn, S. E., Stamlis, T. B., Barrington, W. T., Weida, N., Hudak, C. A. 2010. Food, stress, and reproduction: short-term fasting alters endocrine physiology and reproductive behavior in the zebra finch. *Hormones and Behavior* (2010) 214–222.
- Martin, L.B., Gilliam, J., Han, P., Lee, K.A. & Wikelski, M. (2005) Corticosterone suppresses immune function in temperate but not tropical house sparrows (*Passer domesticus*). *General and Comparative Endocrinology* 140, 126– 135.
- McCormick SD, Bradshaw D. 2006. Hormonal control of salt and water balance in vertebrates. *General and Comparative Endocrinology* 147: 3–8.
- McEwen BS, Wingfield JC. The concept of allostasis in biology and biomedicine. *Horm Behav* 43: 2–15, 2003.
- MacMillen, RE. 1962. The Minimum Water Requirements of Mourning Doves, *The Condor*, 64:165–166
- McNamara, J. M., Z. Barta, M. Klaassen, and S. Bauer 2011. Cues and the optimal timing of activities under environmental changes. *Ecology Letters* 14: 1183–1190.

- Moldenhauer, R. R., and J. A. Wiens. 1970. The water economy of the Sage Sparrow, *Amphispiza bellinevadensk* Condor 72:265-275.
- Pearce-Higgins, J.W., Eglington, S.M., Martay, B., Chamberlain, D.E., 2015. Drivers of climate change impacts on bird communities. Journal of Animal Ecology 84, 943-954
- Peña-Villalobos, I., Narváez, C. & Sabat, P. 2013. Osmoregulatory and metabolic costs of salt excretion in the Rufous-collared sparrow *Zonotrichia capensis*. Comp. Biochem. Physiol. A 164, 314–318
- Perez, C. R., Moye, J. K. and Pritsos, C. A. (2017), Water requirements and drinking rates of homing pigeons: A consideration for exposure risk of migratory birds. Integr Environ Assess Manag, 13: 870-876
- Romero LM, Dickens MJ, Cyr NE. The reactive scope model – a new model integrating homeostasis, allostasis and stress. Horm Behav. 2009;55:375–389
- Romero, L.M. (2004) Physiological stress in ecology: lessons from biomedical research. Trends in Ecology and Evolution, 19, 249– 255.
- Rymer, T. L., Pillay, N. and Schradin, C. (2016). Resilience to droughts in mammals: a conceptual framework for estimating vulnerability of a single species. Q. Rev. Biol. 91, 133-176
- Sabat P, Narváez C, Peña-Villalobos I, Contreras C, Maldonado K, Sanchez-Hernandez JC, Newsome SD, Nespolo R, Bozinovic F. 2017. Coping with salt water habitats: metabolic and oxidative responses to salt intake in the rufous-collared sparrow. Frontiers in physiology 8, 654

- Sabat P, Bozinovic F, Contreras-Ramos C, Nespolo RF, Newsome SD, Quirici V, Maldonado K, Peña-Villalobos I, Ramirez-Otarola N, Carlos Sanchez-Hernandez J. 2019. The interplay between ambient temperature and salt intake affects oxidative status and immune responses in a ubiquitous Neotropical passerine, the rufous-collared sparrow. *Comparative Biochemistry and Physiology Part A: Molecular & Integrative Physiology*, 234, 50-59,
- Saino, N., Ambrosini, R., Rubolini, D., von Hardenberg, J., Provenzale, A., Huppop, K., Huppop, O., Lehikoinen, A., Lehikoinen, E., Rainio, K., Romano, M. & Sokolov, L. (2010). Climate warming, ecological mismatch at arrival and population decline in migratory birds. *Proceedings of the Royal Society of London, Series B: Biological Sciences*. Doi: 10.1098/rspb.2010.1778;
- Santini, L, Isaac, NJB, Maiorano, L, Ficetola GF, Huijbregts MAJ, Carbone C, Thuiller W. 2018. Global drivers of population density in terrestrial vertebrates. *Global Ecol Biogeogr.*27: 968– 979.
- Sapolsky, R.M., Romero, L.M., Munck, A.U., 2000. How do glucocorticosteroids influence stress responses? Integrating permissive, suppressive, stimulatory and preparative actions. *Endocr. Rev.* 21, 55–89
- Skadhauge E. 2012. Osmoregulation in birds. Springer Verlag.
- Taff CC, Vitousek MN. 2016 Endocrine flexibility: optimizing phenotypes in a dynamic world? *Trends Ecol. Evol.* 31, 476–488.
- Wada H, Heidinger B. 2019. Damage-Fitness Model: Evaluation and synthesis, *Integrative and Comparative Biology*, 59:282–291,

- Wingfield JC, Perez JH, Krause JS, Word KR, Gonzalez-Gomez PL, Lisovski S, Chmura HE. 2017. How birds cope physiologically and behaviourally with extreme climatic events. *Phil. Trans. R. Soc. B* 372, 20160140.
- Wingfield JC, Sapolsky RM. Reproduction and resistance to stress: when and how. *J Neuroendocrinol* 2003;15:711–24;
- Wingfield, J. C. (2013). The comparative biology of environmental stress: behavioural endocrinology and variation in ability to cope with novel, changing environments. *Animal Behaviour*, 85 (5), 1127-1133.,
- Wingfield, J.C., Breuner, C., Jacobs, J.D., Lynn, S., Maney, D., Ramenofsky, M., Richardson, R., 1998. Ecological bases of hormone-behavior interactions: the “emergency life history stage.” *Am. Zool.* 38, 191–206
- Wingfield, J.C., C.M. Vleck & M.C. Moore. 1992. Seasonal changes of the adrenocortical response to stress in birds of the Sonora Desert. *J. Exp. Zool.* 264: 419–428
- Zera AT, Harshman LG, Williams TD (2007) Evolutionary endocrinology: the developing synthesis between endocrinology and evolutionary genetics. *Annual Review of Ecology, Evolution, and Systematics*, 38, 793–817
- Zera, A. J. and L. G. Harshman. 2001. The physiology of life history trade-offs in animals. *Annu. Rev. Ecol. Syst.* 32:95–126.

## Figures

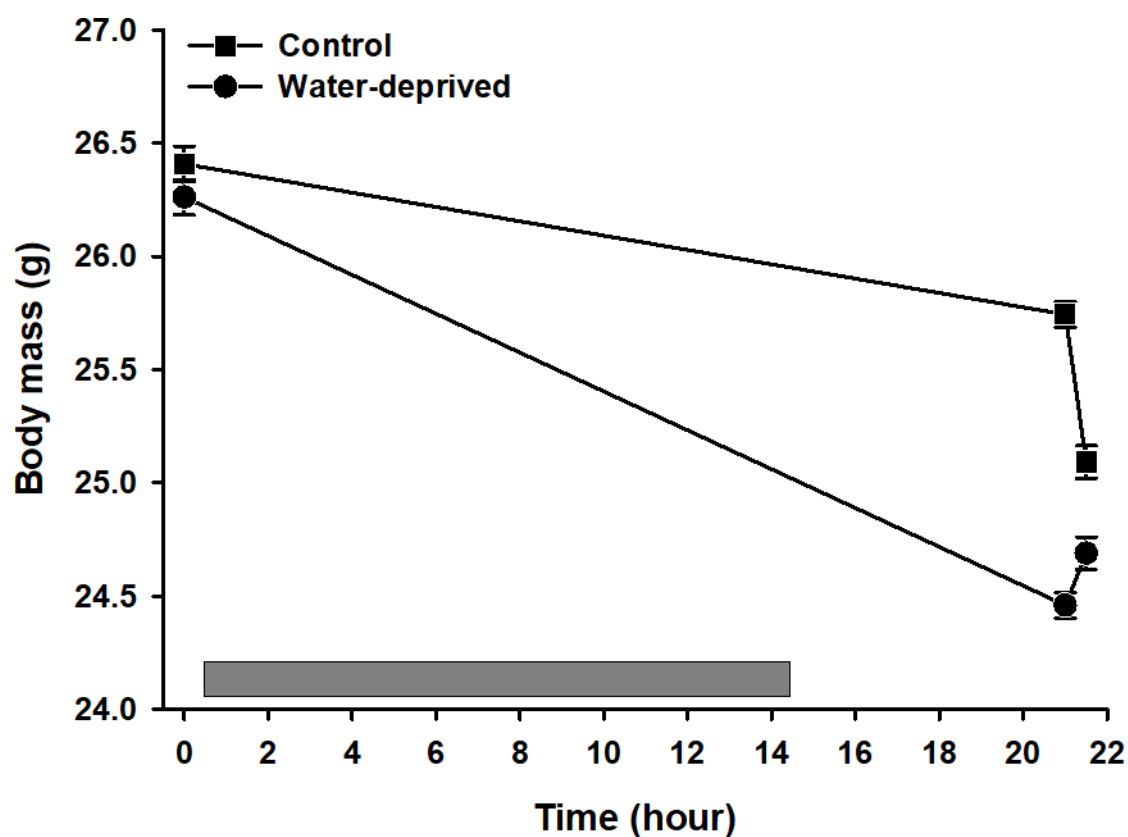

**Figure 1.** Variation of body mass of control (squares) and water-restricted (circles) House sparrows during the experiment. Time is displayed on the “X” axis, and 0 stands for the onset of the experiment (~18h, see text for details). The grey square symbolizes the night period. Values are represented as mean $\pm$ se. N=31 birds in each group. See text for details on statistical differences.

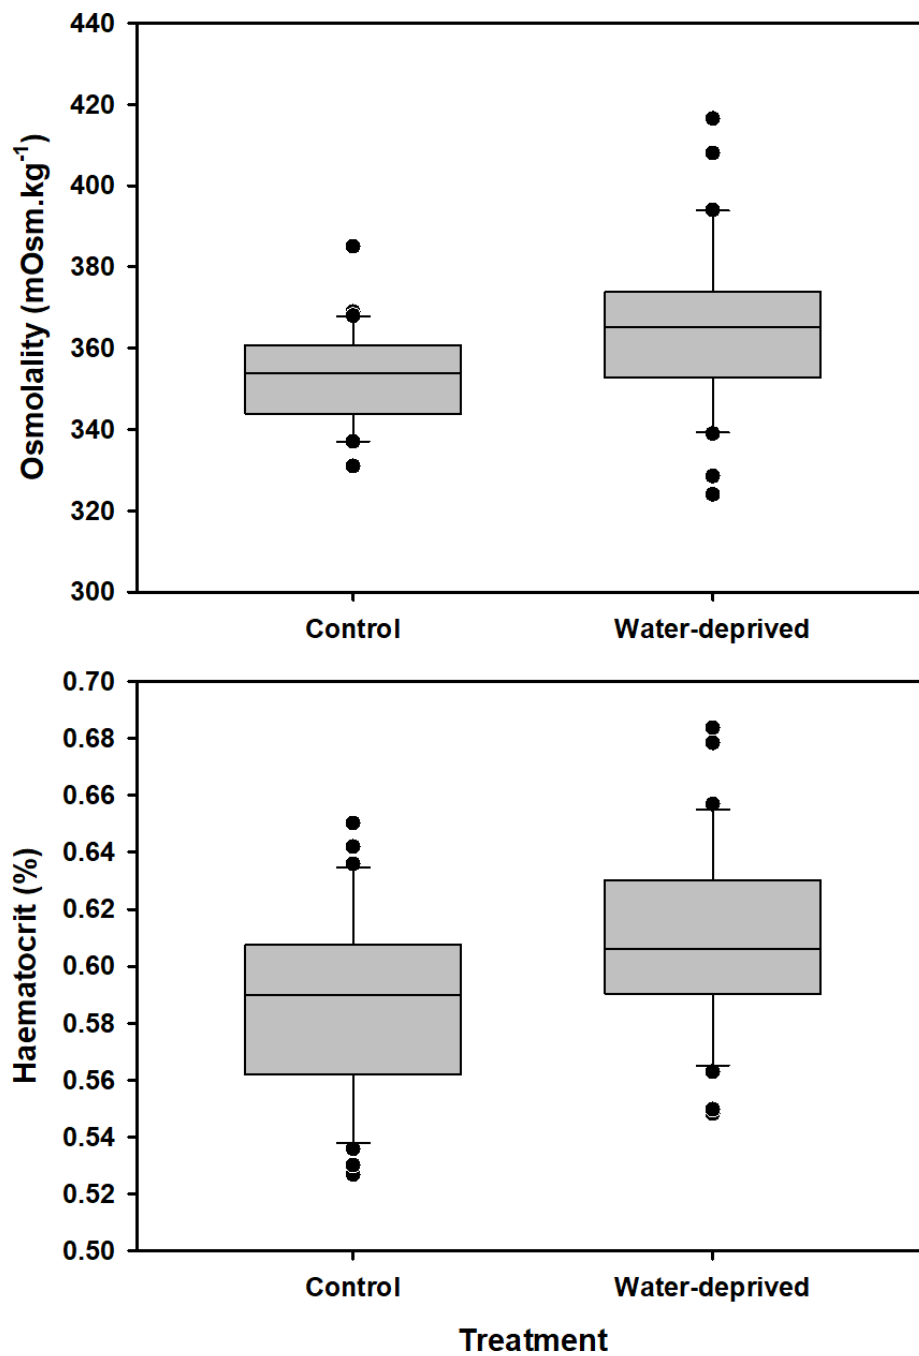

**Figure 2.** Osmolality (upper panel) and haematocrit (lower panel) in control and water-restricted House sparrows. The top and bottom of the boxes represent the first and last quartiles, the line across the box represents the median, the whiskers represent the fifth and ninety-fifth percentiles, and the circles represent outliers. N=31 birds in each group. See text for details on statistical differences.

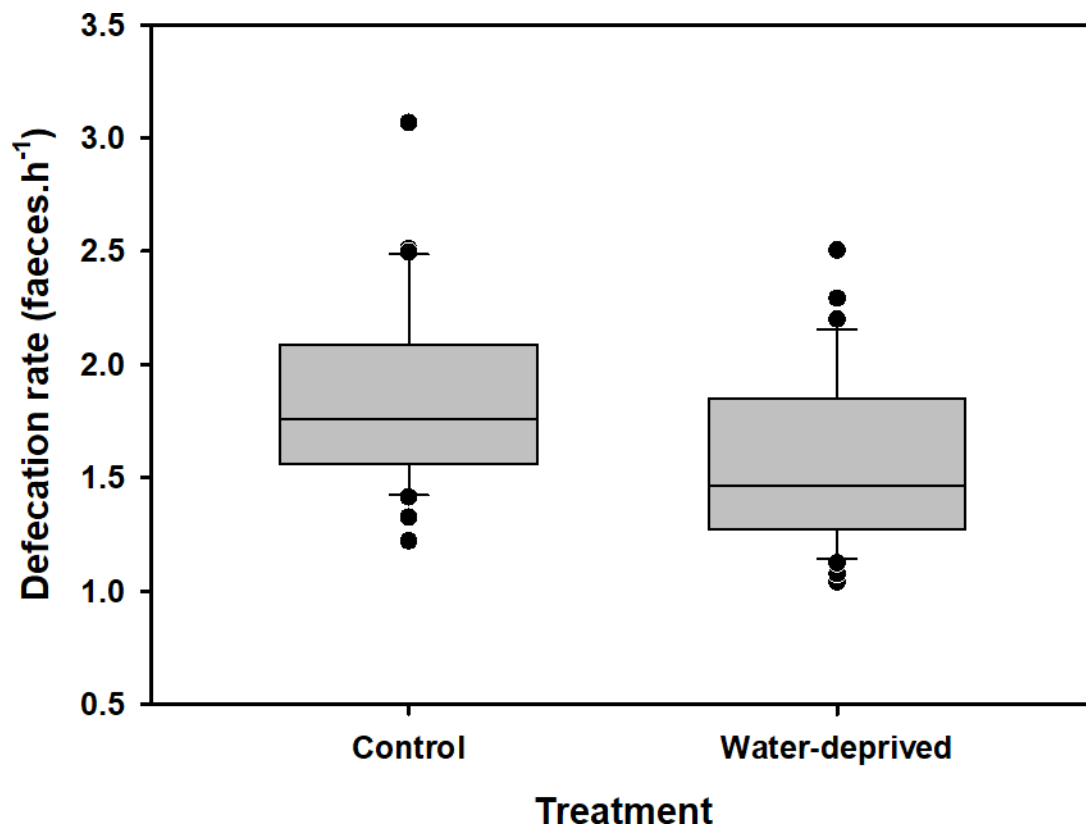

**Figure 3.** Defecation rates of control and water-restricted House sparrows. The top and bottom of the boxes represent the first and last quartiles, the line across the box represents the median, the whiskers represent the fifth and ninety-fifth percentiles, and the circles represent outliers. N=31 birds in each group. See text for details on statistical differences.

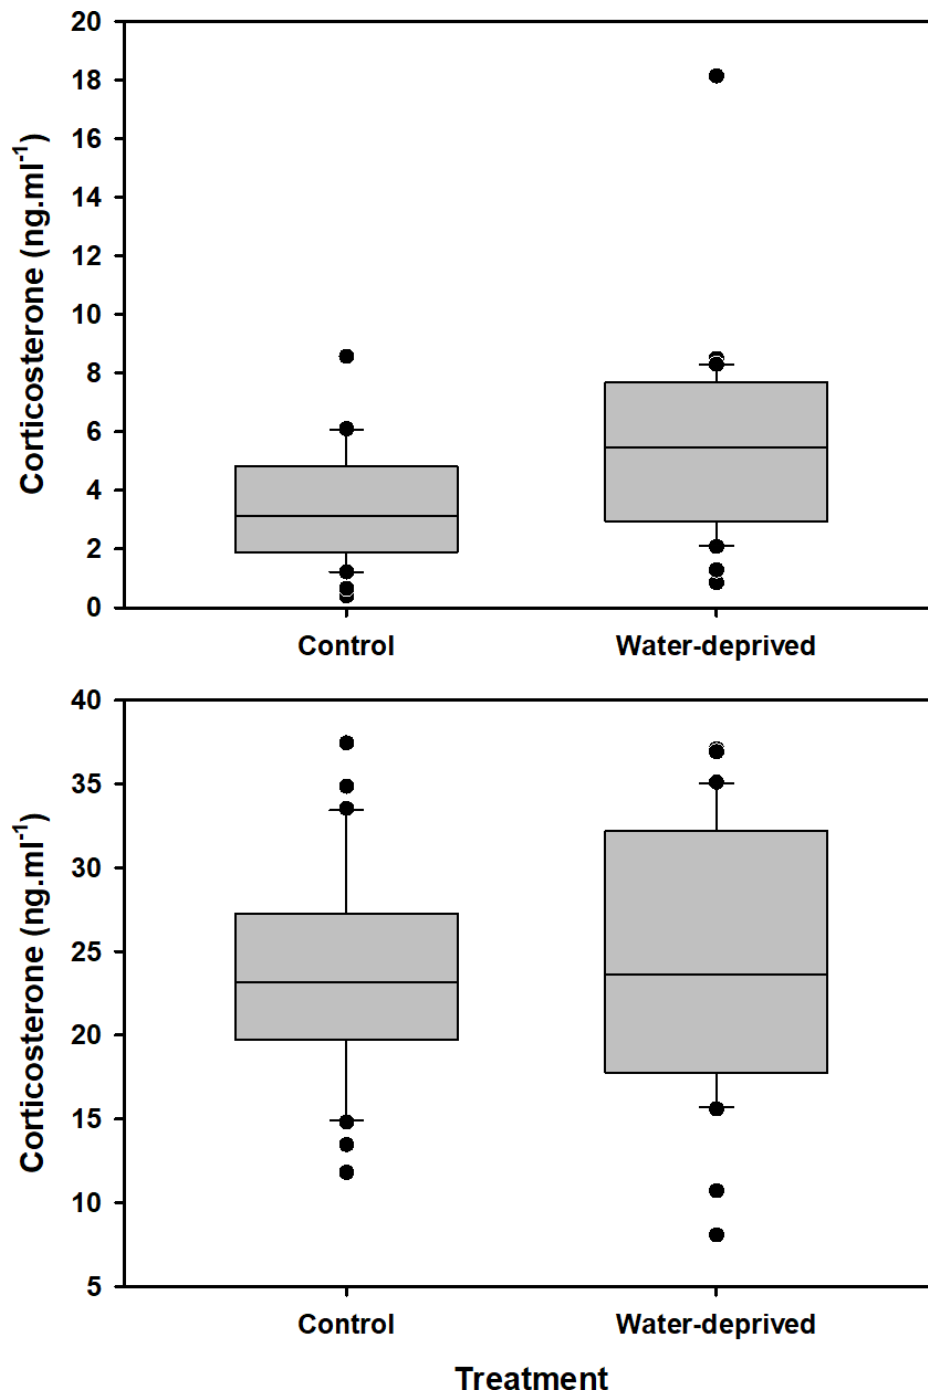

**Figure 4.** Baseline (upper panel) and stress-induced (lower panel) CORT levels in control and water-restricted House sparrows. The top and bottom of the boxes represent the first and last quartiles, the line across the box represents the median, the whiskers represent the fifth and ninety-fifth percentiles, and the circles represent outliers. N=31 birds in each group. See text for details on statistical differences.
